# Supplementary material for: Detecting the population dynamics of an autosomal sex ratio distorter transgene in malaria vector mosquitoes
Source: PubMed Central journal article supplement (PMC7594489; doi:10.1111/1365-2664.13702), 2020-07-20
Supplement: JPE-57-2086-s001.pdf [file JPE-57-2086-s001.pdf]

1 **Appendix S1.** Description of comparator wild-type and transgenic Ag(PMB)1 strains

2

3 **Mosquito strains**

4 G3 is a wild-type colony (stock number MRA-112) which has been maintained in the  
5 laboratory for 43 years (Malaria Research and Reference Reagent Resource Center 2017). This  
6 strain derives from a region in West Africa (the Gambia) where two incipient species, *An. gambiae*  
7 and *An. coluzzii*, coexist. G3 strain is assumed to be an inter-specific hybrid between *An. gambiae*  
8 and *An. coluzzii*, but no complete genome sequence data are still published to confirm this  
9 assumption. However, as VectorBase reported “On the basis of both inversion polymorphisms and  
10 rDNA characteristics, this colony has been suggested to represent a mix of *Anopheles gambiae* and  
11 *Anopheles coluzzii*. Since this colony has been distributed broadly among different institutions  
12 without any specific molecular or inversion efforts at quality control, it should probably simply be  
13 recognized as a hybrid stock (*An. gambiae s.l.*)” ([https://www.vectorbase.org/organisms/anopheles-](https://www.vectorbase.org/organisms/anopheles-coluzzii/g3)  
14 [coluzzii/g3](https://www.vectorbase.org/organisms/anopheles-coluzzii/g3)).

15 Ag(PMB)1 transgenic line was developed from the G3 strain and classified as a sex ratio  
16 distorter - autosomal X-shredder based on I-PopI homing endonuclease (Galizi et al., 2014). This  
17 strain is marked with the fluorescent marker *3XP3DsRed* and green fluorescence protein (GFP), the  
18 latter of which was fused to I-PpoI. Both GFP and the I-PpoI enzyme were expressed in sperm. Due  
19 to the sex ratio distortion conferred by the transgene, Ag(PMB)1 strain has been maintained in the  
20 laboratory by continuously backcrossing Ag(PMB)1 females to G3 males. The transgenic  
21 mosquitoes used for these experiments were screened for the expression of the *3xP3 DsRed*  
22 fluorescent marker using a Complex Object Parametric Analyzer and Sorter (COPAS, Union  
23 Biometrica, Boston, USA). This backcrossing procedure promoted a high genetic similarity  
24 between transgenic individuals and wild-type counterparts, except for the transgene itself (Galizi et  
25 al., 2014). Life-history parameters of wild-type and transgenic Ag(PMB)1 mosquito strains were

26 collected from literature or experiments (please see subchapter of the Material and Methods  
27 *Additional survival measurements of wild-type and Ag(PMB)I for model parametrization*).

28 Mosquito strains were maintained and reared in a climate-controlled room at a temperature  
29 of  $27 \pm 1^\circ\text{C}$  and  $75\% \pm 10\%$  relative humidity, with a 12:12h light and dark regime. The mosquitoes  
30 were reared as described in Valerio et al. (2016) with the following modifications. Adult  
31 mosquitoes were carried in plastic cages of  $17.5 \times 17.5 \times 17.5$  cm and fed *ad libitum* with a 10%  
32 sucrose solution with 0.1% of methylparaben (Benedict, Hood-Nowotny, Howell, & Wilkins 2008).  
33 Females were blood fed weekly with defibrinated and heparinized sterile cow blood (Allevamento  
34 Blood di Fiastra Maddalena, Teramo, Italy) using a Hemotek membrane feeder  
35 (DiscoveryWorkshops, Accrington, UK). Eggs were collected and placed in a single tray with 350  
36 mL of deionized water for hatching and provided 5 mL of 2% w/v larval diet. Subsequently, larvae  
37 were allotted to three trays (each containing about 250 larvae) and maintained according to the  
38 standard rearing protocol based on Damien's larval diet as the food source (Damiens, Benedict,  
39 Wille, & Gilles 2012). Pupae were collected and placed in small crystallization dish glass inside a  
40 fresh adult cage for emergence.

41

## 42 **References**

- 43 Benedict, M., Hood-Nowotny, R., Howell, P., Wilkins, E. (2008). Methylparaben in *Anopheles*  
44 *gambiae* s.l. sugar meals increases longevity and malaria oocyst abundance but is not a preferred  
45 diet. *Journal of Insect Physiology*, 55, 197-204. doi:10.1016/j.jinsphys.2008.11.003
- 46 Damiens, D., Benedict, M.Q., Wille, M., Gilles, J.R.L. (2012). An inexpensive and effective larval  
47 diet for *Anopheles arabiensis* (Diptera: Culicidae): eat like a horse, a bird, or a fish? *Journal of*  
48 *Medical Entomology*, 49(5), 1001–1111.
- 49 Galizi, R., Doyle, L.A., Menichelli, M., Bernardini, F., Deredec, A., Burt, A.,...Crisanti A. (2014).  
50 Synthetic sex ratio distortion system for the control of the human malaria mosquito. *Nature*  
51 *Communications*, 5, 3977. doi:10.1038/ncomms4977

52 Valerio, L., North, A., Collins, M.C., Mumford, J.D., Facchinelli, L., Spaccapelo, R., Benedict,  
53 MQ. (2016). Comparison of model predictions and laboratory observations of transgene frequencies  
54 in continuously-breeding mosquito populations. *Insects*, 7, E47. doi:10.3390/insects7040047.
